# Supplementary material for: Improving LiNiO2 cathode performance through particle design and optimization
Source: Royal Society of Chemistry journal article supplement (doi:10.1039/d2ta02492f), 2022-01-01
Supplement: d2ta02492f1.pdf [file d2ta02492f1.pdf]

### Supporting Information

**Table S1.** Synthesis conditions for the SC-LNO samples.

| Molten-salt                                     | R ratio | Lithium precursor (mole) | Nickel precursor (mole) | Synthesis Temp. (°C) | Annealing Temp. (°C) | Sample obtained |
|-------------------------------------------------|---------|--------------------------|-------------------------|----------------------|----------------------|-----------------|
| Li <sub>2</sub> SO <sub>4</sub> : LiOH<br>(4:1) | 2       | 1                        | 1                       | 750                  | 700                  | Cubic-SC-LNO    |
| KCl : LiCl<br>(3:2)                             | 4       | 2                        | 1                       | 750                  | 700                  | Oct-SC-LNO      |
| CsCl                                            | 1.56    | 2                        | 1                       | 750                  | 700                  | T-poly-SC-LNO   |

**Table S2.** Additional Rietveld refinement results of the SC-LNO XRD patterns.

| <b>Cubic-SC-LNO</b>  | LiNiO <sub>2</sub> (R <sup>3</sup> m), $a=b=2.8793(6)\text{\AA}$ , $c=14.2035(4)\text{\AA}$ , $V=101.977(4)\text{\AA}^3$ , $R=1.32$ |          |          |          |             |
|----------------------|-------------------------------------------------------------------------------------------------------------------------------------|----------|----------|----------|-------------|
|                      | <b>x</b>                                                                                                                            | <b>y</b> | <b>z</b> | <b>B</b> | <b>Occ.</b> |
| Li                   | 0                                                                                                                                   | 0        | 0        | 7.51828  | 2.84420     |
| Ni                   | 0                                                                                                                                   | 0        | 0        | 7.51828  | 0.15580     |
| Ni                   | 0                                                                                                                                   | 0        | 0.5      | 4.77290  | 2.84420     |
| Li                   | 0                                                                                                                                   | 0        | 0.5      | 4.77290  | 0.15580     |
| O                    | 0                                                                                                                                   | 0        | 0.24209  | 6.29250  | 6.00000     |
| <b>Oct-SC-LNO</b>    | LiNiO <sub>2</sub> (R <sup>3</sup> m), $a=b=2.8792(5)\text{\AA}$ , $c=14.2081(3)\text{\AA}$ , $V=102.002(3)\text{\AA}^3$ , $R=3.38$ |          |          |          |             |
|                      | <b>x</b>                                                                                                                            | <b>y</b> | <b>z</b> | <b>B</b> | <b>Occ.</b> |
| Li                   | 0                                                                                                                                   | 0        | 0        | 7.69419  | 2.82196     |
| Ni                   | 0                                                                                                                                   | 0        | 0        | 7.69419  | 0.17804     |
| Ni                   | 0                                                                                                                                   | 0        | 0.5      | 4.97626  | 2.82196     |
| Li                   | 0                                                                                                                                   | 0        | 0.5      | 4.97626  | 0.17804     |
| O                    | 0                                                                                                                                   | 0        | 0.24277  | 6.22367  | 6.00000     |
| <b>T-poly-SC-LNO</b> | LiNiO <sub>2</sub> (R <sup>3</sup> m), $a=b=2.8788(3)\text{\AA}$ , $c=14.2028(3)\text{\AA}$ , $V=101.932(3)\text{\AA}^3$ , $R=2.02$ |          |          |          |             |
|                      | <b>x</b>                                                                                                                            | <b>y</b> | <b>z</b> | <b>B</b> | <b>Occ.</b> |
| Li                   | 0                                                                                                                                   | 0        | 0        | 8.39519  | 2.85358     |
| Ni                   | 0                                                                                                                                   | 0        | 0        | 8.39519  | 0.14642     |
| Ni                   | 0                                                                                                                                   | 0        | 0.5      | 4.61558  | 2.85358     |
| Li                   | 0                                                                                                                                   | 0        | 0.5      | 4.61558  | 0.14642     |
| O                    | 0                                                                                                                                   | 0        | 0.24122  | 6.46622  | 6.00000     |

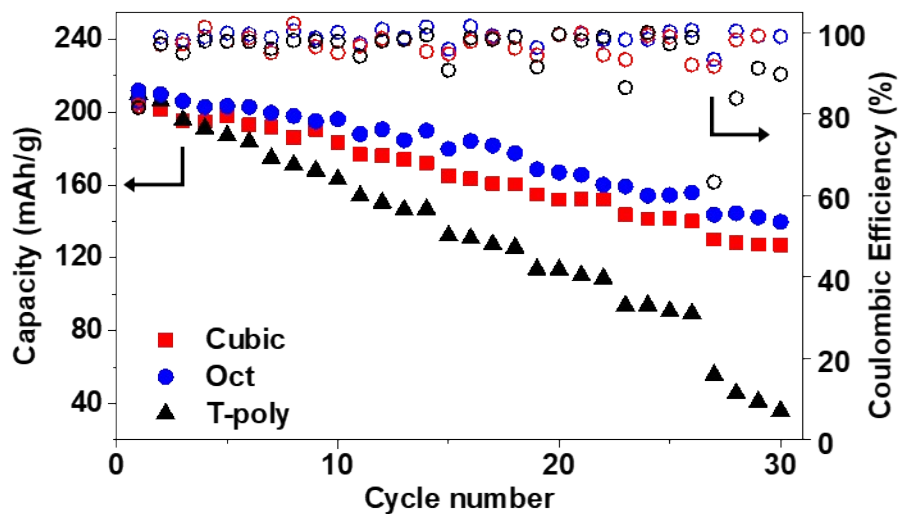

**Figure S1.** Comparison of cathode rate capability and the corresponding coulombic efficiency.

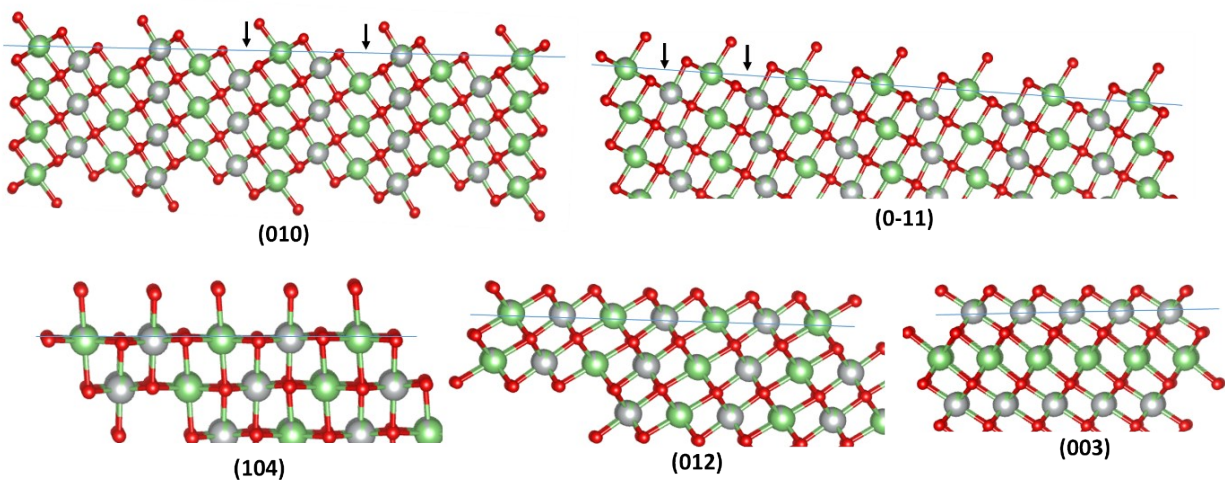

**Figure S2.** Atom arrangements of the various crystal planes.
